# Supplementary material for: The dual HDAC-PI3K inhibitor CUDC-907 displays single-agent activity and synergizes with PARP inhibitor olaparib in small cell lung cancer
Source: Springer Nature journal article supplement (doi:10.1186/s13046-020-01728-2), 2020-10-17
Supplement: MOESM2 [file 18495104]

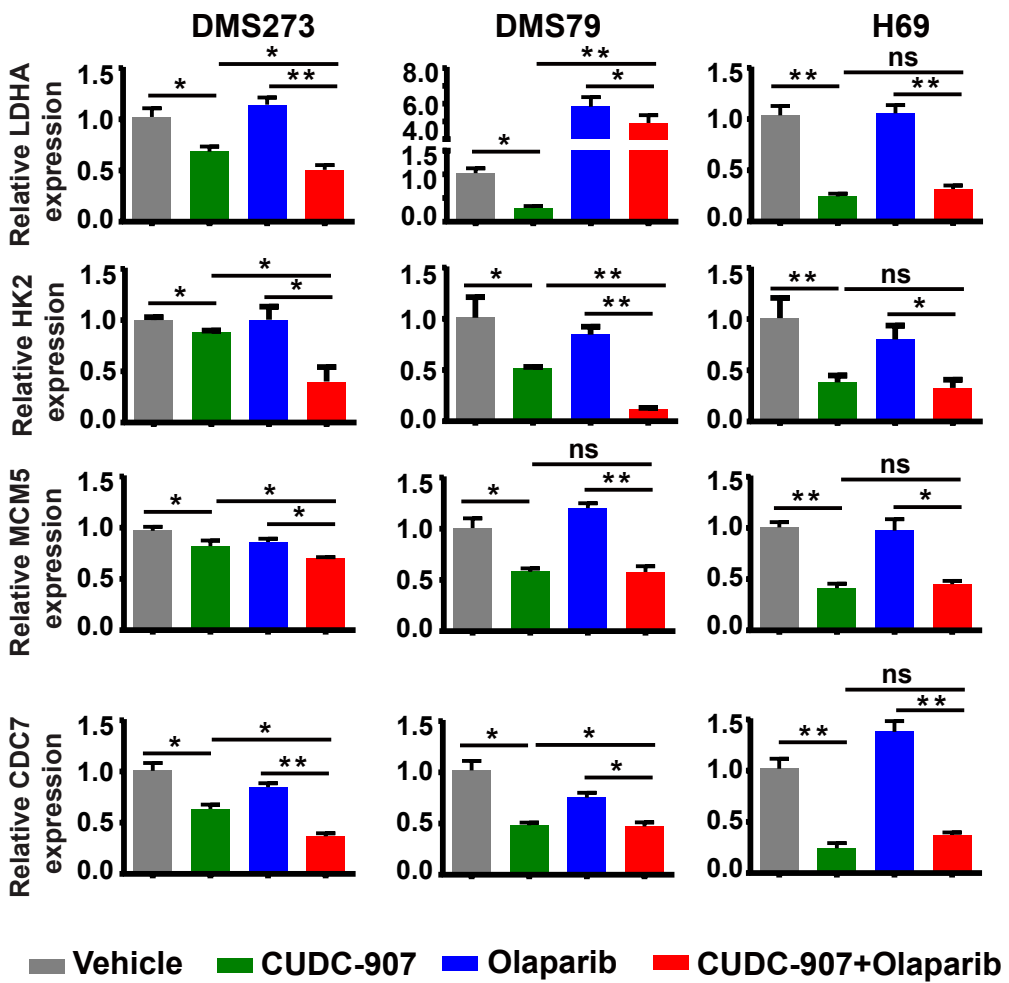

**Figure S2.**
